# Supplementary material for: Association between high deductible health plan coverage and age at pediatric umbilical hernia repair
Source: HighWire-hosted journal article supplement (doi:10.1136/wjps-2022-000526), 2023-03-01

## Online Appendix

**Table 1. Procedure and Diagnosis Codes Used to Identify Umbilical Hernia Repairs**

| <b>PROCEDURE CODES</b> |                                                                                               |
|------------------------|-----------------------------------------------------------------------------------------------|
| <b>CPT</b>             |                                                                                               |
| 49580                  | Repair umbilical hernia, < 5 years, reducible                                                 |
| 49585                  | Repair umbilical hernia, >5 years, reducible                                                  |
| 49652                  | Laparoscopy, surgical, repair, ventral, umbilical, spigelian, or epigastric hernia, reducible |
| 49659                  | Unlisted laparoscopy procedure, hernioplasty, herniorrhaphy, herniotomy                       |
| <b>ICD-9-CM</b>        |                                                                                               |
| 53.4                   | Repair of umbilical hernia                                                                    |
| 53.41                  | Other and open repair of umbilical hernia with graft or prosthesis                            |
| 53.42                  | Laparoscopic repair of umbilical hernia with graft or prosthesis                              |
| 53.43                  | Other laparoscopic umbilical herniorrhaphy                                                    |
| 53.49                  | Other open umbilical herniorrhaphy                                                            |
| <b>ICD-10-PCS</b>      |                                                                                               |
| 0WQF0ZZ                | Repair abdominal wall, open approach                                                          |
| 0WQF3ZZ                | Repair abdominal wall, percutaneous approach                                                  |
| 0WQF4ZZ                | Repair abdominal wall, percutaneous endoscopic approach                                       |
| <b>DIAGNOSIS CODES</b> |                                                                                               |
| <b>ICD-9-CM</b>        |                                                                                               |
| 553.1                  | Umbilical hernia without mention of obstruction or gangrene                                   |
| <b>ICD-10-CM</b>       |                                                                                               |
| K42.9                  | Umbilical hernia without obstruction or gangrene                                              |

Patients had to have both a procedure code and a diagnosis code

**Table 2. Metropolitan Statistical Areas (MSAs) included in the study**

|                                          |                                                    |
|------------------------------------------|----------------------------------------------------|
| Albany-Schenectady-Troy, NY              | Milwaukee-Waukesha-West Allis, WI                  |
| Albuquerque, NM                          | Minneapolis-St. Paul-Bloomington, MN-WI            |
| Ann Arbor, MI                            | Monroe, MI                                         |
| Atlanta-Sandy Springs-Roswell, GA        | Myrtle Beach-Conway-North Myrtle Beach, SC-NC      |
| Augusta-Richmond County, GA-SC           | Nashville-Davidson--Murfreesboro--Franklin, TN     |
| Austin-Round Rock, TX                    | Nassau County-Suffolk County, NY                   |
| Baltimore-Columbia-Towson, MD            | Newark, NJ-PA                                      |
| Baton Rouge, LA                          | New Haven-Milford, CT                              |
| Beaumont-Port Arthur, TX                 | New Orleans-Metairie, LA                           |
| Boise City, ID                           | North Port-Sarasota-Bradenton, FL                  |
| Bridgeport-Stamford-Norwalk, CT          | Oakland-Hayward-Berkeley, CA                       |
| Cambridge-Newton-Framingham, MA          | Ogden-Clearfield, UT                               |
| Charleston-North Charleston, SC          | Oklahoma City, OK                                  |
| Charlotte-Concord-Gastonia, NC-SC        | Omaha-Council Bluffs, NE-IA                        |
| Chattanooga, TN-GA                       | Orlando-Kissimmee-Sanford, FL                      |
| Chicago-Naperville-Arlington Heights, IL | Oxnard-Thousand Oaks-Ventura, CA                   |
| Cincinnati, OH-KY-IN                     | Palm Bay-Melbourne-Titusville, FL                  |
| Cleveland-Elyria, OH                     | Pensacola-Ferry Pass-Brent, FL                     |
| Columbia, SC                             | Phoenix-Mesa-Scottsdale, AZ                        |
| Corpus Christi, TX                       | Portland-South Portland, ME                        |
| Dallas-Plano-Irving, TX                  | Port St. Lucie, FL                                 |
| Dayton, OH                               | Providence-Warwick, RI-MA                          |
| Des Moines-West Des Moines, IA           | Provo-Orem, UT                                     |
| Detroit-Dearborn-Livonia, MI             | Raleigh, NC                                        |
| Durham-Chapel Hill, NC                   | Richmond, VA                                       |
| El Paso, TX                              | Riverside-San Bernardino-Ontario, CA               |
| Evansville, IN-KY                        | Roanoke, VA                                        |
| Flint, MI                                | Rochester, NY                                      |
| Fort Wayne, IN                           | Rockford, IL                                       |
| Fort Worth-Arlington, TX                 | Rockingham County-Strafford County, NH             |
| Fresno, CA                               | Sacramento--Roseville--Arden-Arcade, CA            |
| Grand Rapids-Wyoming, MI                 | St. Louis, MO-IL                                   |
| Greensboro-High Point, NC                | Salt Lake City, UT                                 |
| Greenville-Anderson-Mauldin, SC          | San Antonio-New Braunfels, TX                      |
| Hartford-West Hartford-East Hartford, CT | San Diego-Carlsbad, CA                             |
| Houston-The Woodlands-Sugar Land, TX     | San Francisco-Redwood City-South San Francisco, CA |
| Indianapolis-Carmel-Anderson, IN         | San Jose-Sunnyvale-Santa Clara, CA                 |
| Kansas City, MO-KS                       | Savannah, GA                                       |
| Knoxville, TN                            | Seattle-Bellevue-Everett, WA                       |
| Lafayette, LA                            | Stockton-Lodi, CA                                  |
| Lake County-Kenosha County, IL-WI        | Tacoma-Lakewood, WA                                |
| Lakeland-Winter Haven, FL                | Tampa-St. Petersburg-Clearwater, FL                |
| Lansing-East Lansing, MI                 | Toledo, OH                                         |
| Lexington-Fayette, KY                    | Trenton, NJ                                        |
| Lincoln, NE                              | Tucson, AZ                                         |
| Little Rock-North Little Rock-Conway, AR | Washington-Arlington-Alexandria, DC-VA-MD-WV       |
| Los Angeles-Long Beach-Glendale, CA      | Wilmington, DE-MD-NJ                               |
| Louisville/Jefferson County, KY-IN       | Wilmington, NC                                     |
| McAllen-Edinburg-Mission, TX             | Winston-Salem, NC                                  |
| Memphis, TN-MS-AR                        | Worcester, MA-CT                                   |

**Table 3. Results of instrumental variable analyses to estimate the association of CDHPs or HDHPs with the probability of umbilical hernia repair being performed before age 4 years or after age 5 years**

| Outcome                           | CDHPs vs. all other types of health plans besides HDHPs |      | HDHPs vs. all other types of health plans besides HDHPs |      |
|-----------------------------------|---------------------------------------------------------|------|---------------------------------------------------------|------|
|                                   | Risk difference (95% CI)                                | P    | Risk difference (95% CI)                                | P    |
| <b>Surgery before age 4 years</b> | 0.051 (-0.257-0.358)                                    | 0.75 | 0.049 (-0.249-0.347)                                    | 0.75 |
| <b>Surgery after age 5 years</b>  | 0.029 (-0.318-0.376)                                    | 0.87 | 0.028 (-0.309-0.364)                                    | 0.87 |

Results are from two-stage least squares regression models with heteroscedasticity-robust standard errors and that included MSA, year, child sex, the presence of any chronic condition, whether a concurrent surgical procedure was performed, and the MSA/year-level median household income in households with children and MSA/year-level percentage of children of non-Hispanic White race/ethnicity. MSA=metropolitan statistical area, CDHP=consumer-directed health plan HDHP=high deductible health plan

**Table 4. Results of instrumental variable analyses to estimate the association of HDHPs with the probability of umbilical hernia repair being performed before age 4 years or after age 5 years: excluding children with concurrent surgical procedures**

|                                   | Risk difference (95% CI) | P    |
|-----------------------------------|--------------------------|------|
| <b>Surgery before age 4 years</b> | -0.014 (-0.184-0.155)    | 0.87 |
| <b>Surgery after age 5 years</b>  | 0.028 (-0.169-0.225)     | 0.78 |

Results are from two-stage least squares regression models with heteroscedasticity-robust standard errors and that included MSA, year, child sex, the presence of any chronic condition, and the MSA/year-level median household income in households with children and MSA/year-level percentage of children of non-Hispanic White race/ethnicity.

MSA=metropolitan statistical area, HDHP=high deductible health plan

**Figure 1. Month of umbilical hernia repair by high deductible health plan status in children under 4 years of age.**

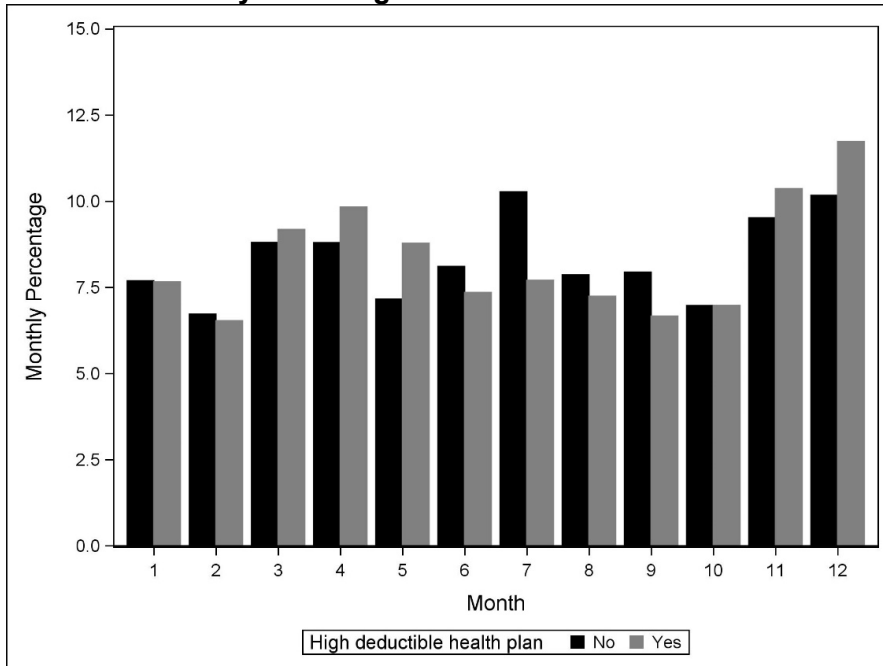

**Figure 2. Month of umbilical hernia repair by high deductible health plan status in children older than 5 years of age.**

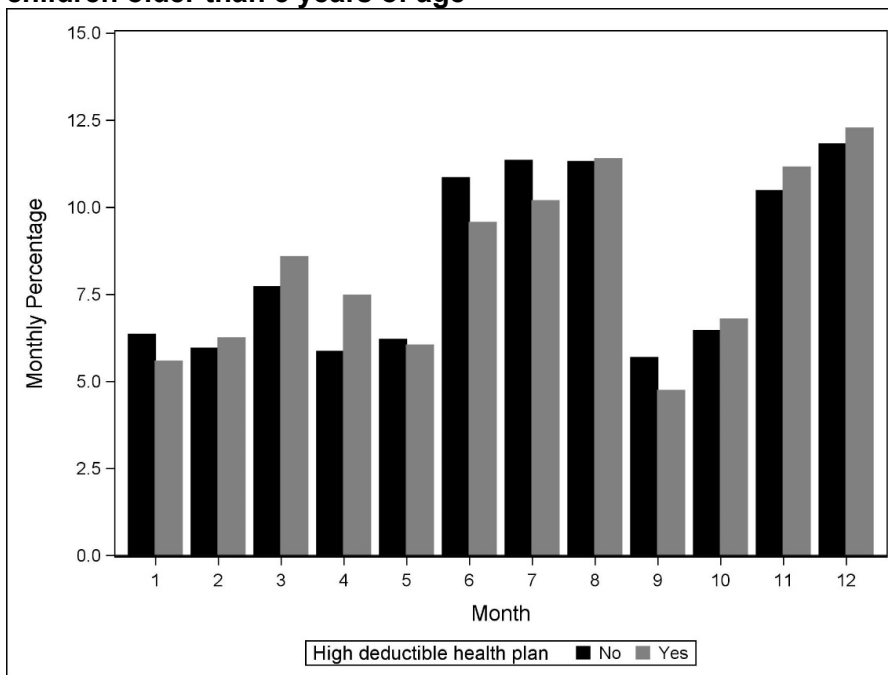

Supplement: wjps-2022-000526supp001_data_supplement.pdf [file wjps-2022-000526supp001_data_supplement.pdf]
